# Supplementary material for: Controlled growth of lead-free cesium zirconium halide double perovskite nanocrystals through a microfluidic reactor
Source: Royal Society of Chemistry journal article supplement (doi:10.1039/d2nr06727g), 2023-01-01
Supplement: d2nr06727g1.pdf [file d2nr06727g1.pdf]

## Supplementary Information

### Controlled Growth of Lead-Free Cesium Zirconium Halide Double Perovskite Nanocrystals through Microfluidic Reactor

Yimin Geng, Hao Lv, Shu Xu, Chong Geng\*

School of Electronics and Information Engineering, Hebei University of Technology, 5340 Xiping Road, Tianjin 300401, P. R. China

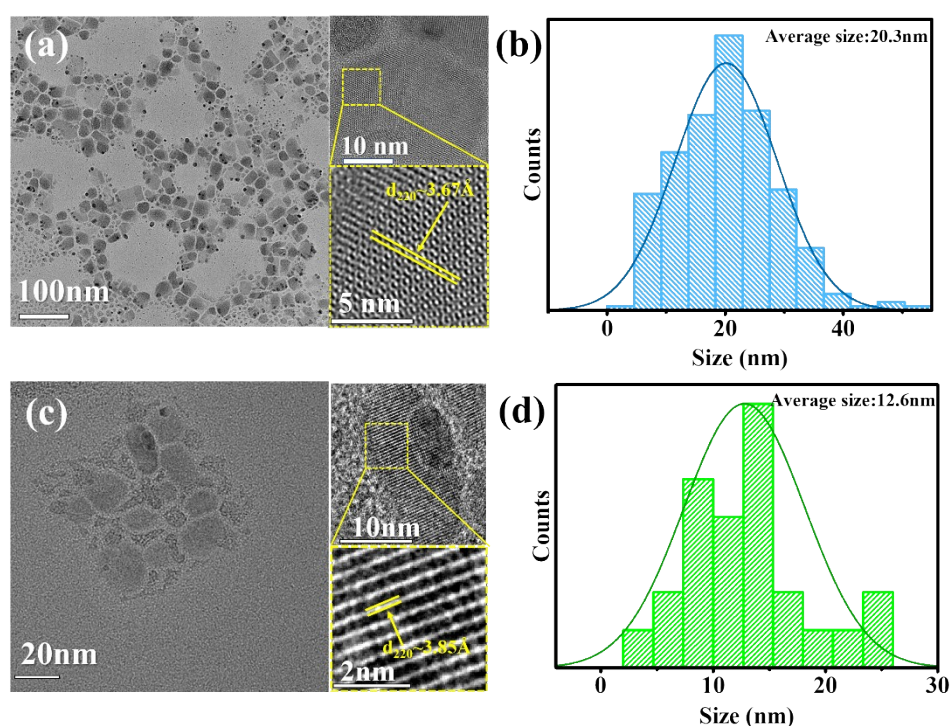

**Figure S1** (a) TEM image and (b) size distribution histogram of  $\text{Cs}_2\text{ZrCl}_6$  NCs; (c) TEM image and (d) size distribution histogram of  $\text{Cs}_2\text{ZrBr}_6$  NCs.

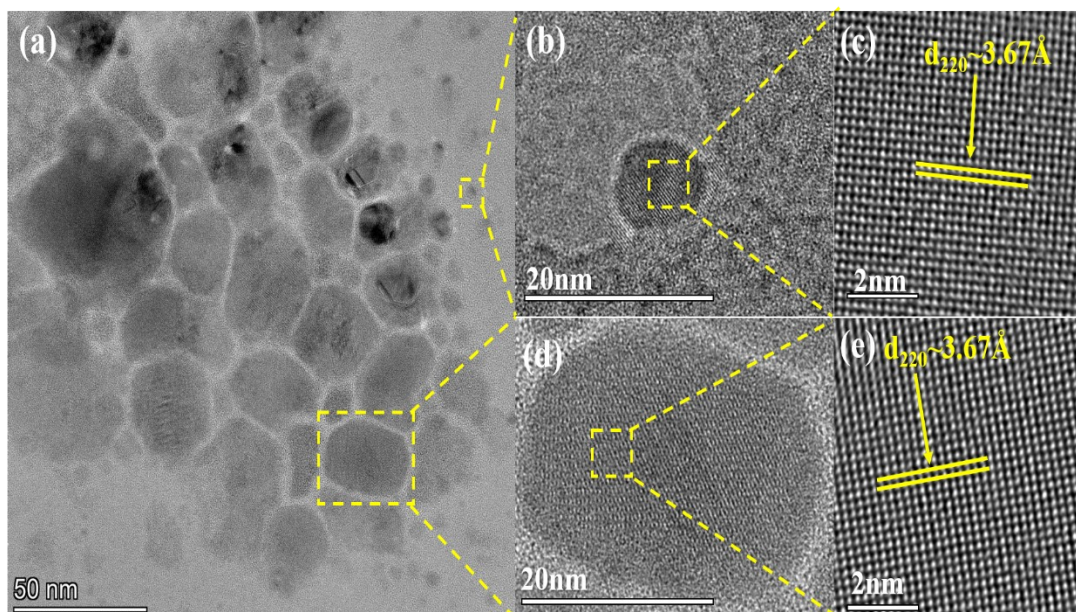

**Figure S2** (a) TEM image of  $\text{Cs}_2\text{ZrCl}_6$  NCs. HR-TEM image of (b, c) single small  $\text{Cs}_2\text{ZrCl}_6$  particle, and (d, e) single large  $\text{Cs}_2\text{ZrCl}_6$  nanosheet.

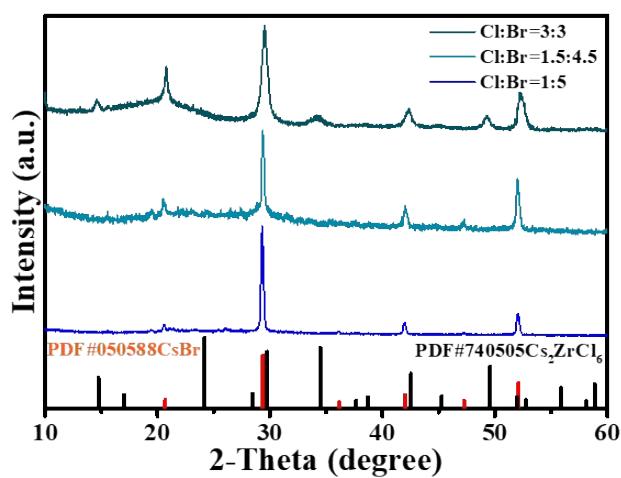

**Figure S3** XRD patterns of the NCs synthesized with  $\text{TMSCl}/\text{TMSBr}$  precursor ratios of 3:3, 1:5 and 1.5:4.5, respectively.

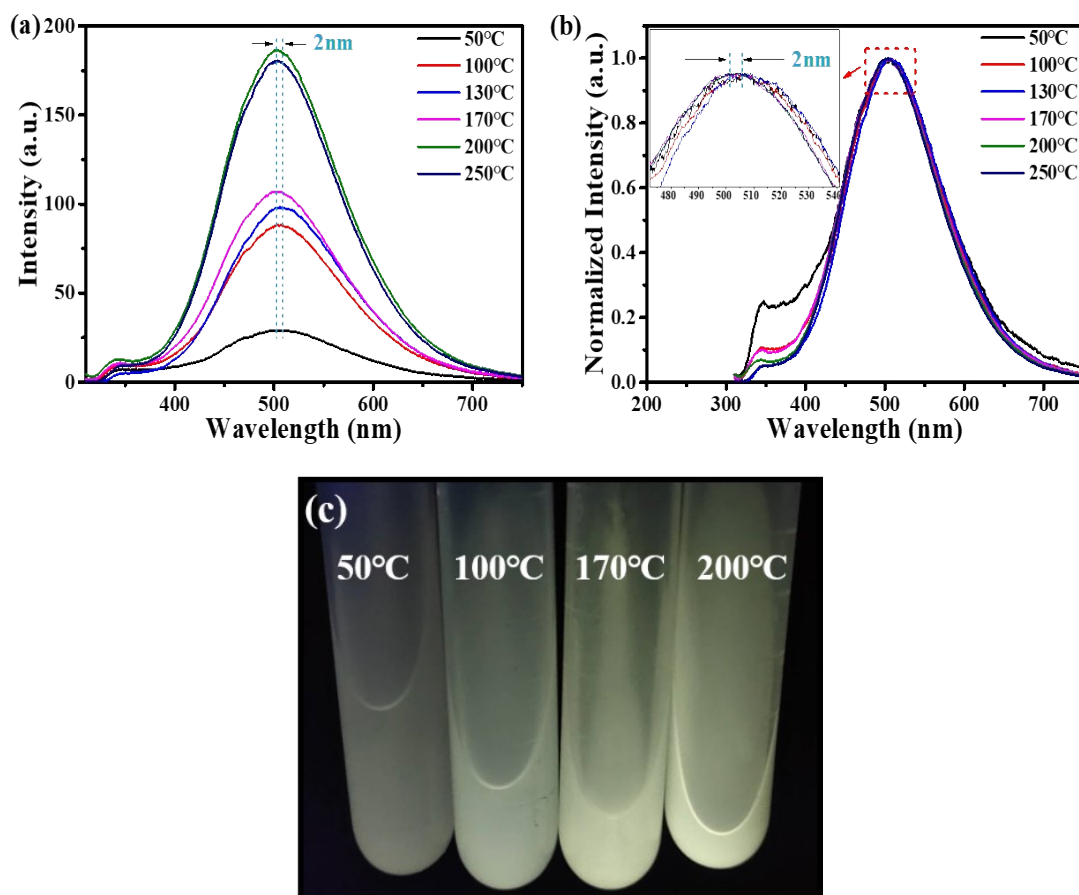

**Figure S4** (a) Relative PL and (b) normalized PL spectra of the  $\text{Cs}_2\text{ZrBr}_6$  NCs synthesized at 50 °C, 100 °C, 130 °C, 170 °C, 200 °C and 250 °C reaction temperatures; (c) Photographs of the samples under UV light excitation.

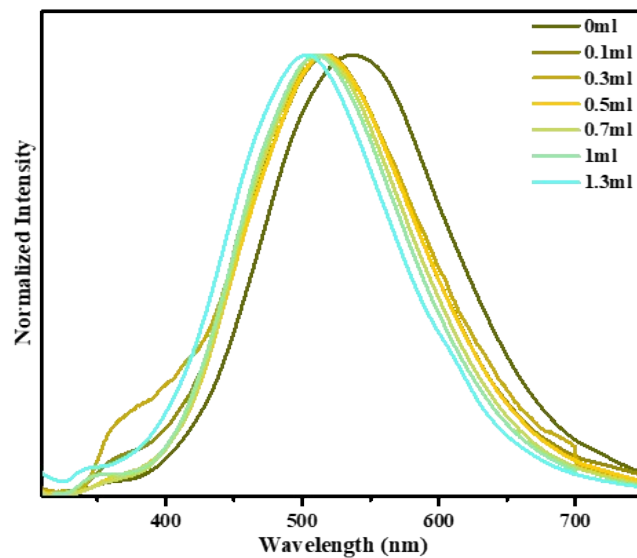

**Figure S5** PL spectra of  $\text{Cs}_2\text{ZrBr}_6$  NCs prepared with different amount of OAm.

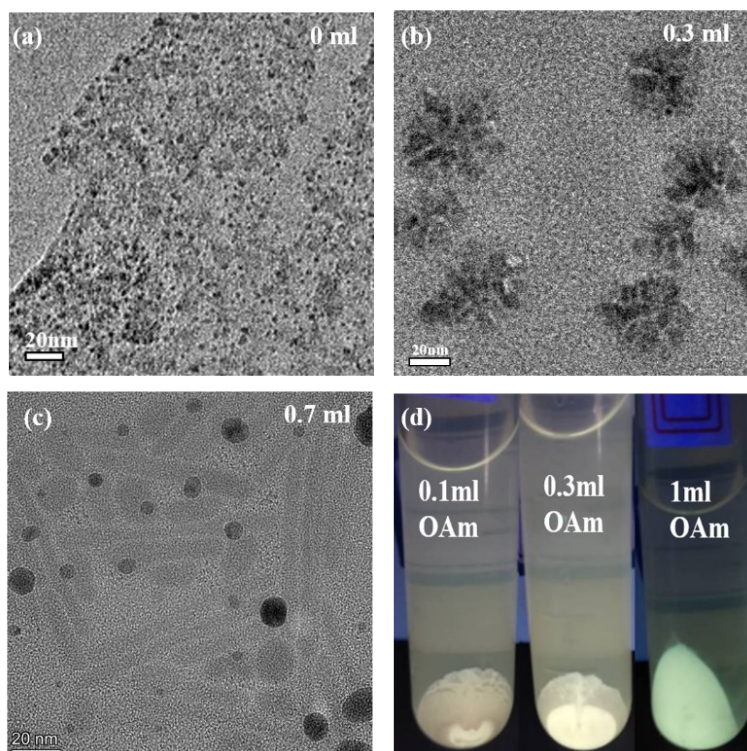

**Figure S6** TEM patterns of  $\text{Cs}_2\text{ZrBr}_6$  NCs prepared at (a) 0 ml, (b) 0.3 ml, and (c) 0.7 ml OAm; (d) Photographs of the prepared samples with different amount of OAm after centrifugation.

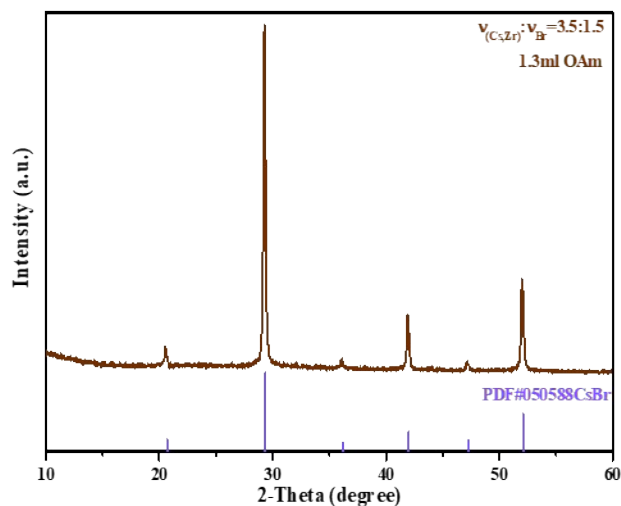

**Figure S7** XRD pattern of the samples prepared at a precursor flow rate ratio of 3.5:1.5 and 1.3 ml of OAm.

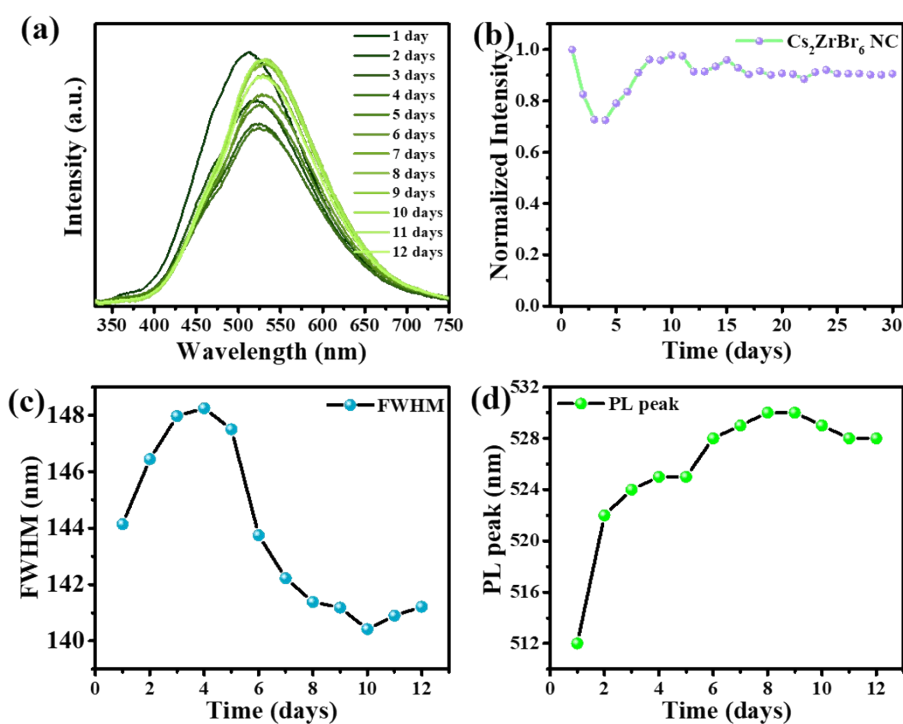

**Figure S8** (a) Relative PL spectra of the prepared Cs<sub>2</sub>ZrBr<sub>6</sub> NCs upon long-time exposure in air, (b) temporal evolution of the relative integrated PL intensity, (c) PL peak wavelength, and (d) FWHM of the Cs<sub>2</sub>ZrBr<sub>6</sub> NCs.

**Table S1** Structural parameters of Cs<sub>2</sub>ZrBr<sub>6</sub>.

| <b>Material</b>                   | <b>Space group</b> | <b>a=b=c(Å)</b> | <b>V/Å<sup>3</sup></b> |
|-----------------------------------|--------------------|-----------------|------------------------|
| Cs <sub>2</sub> ZrBr <sub>6</sub> | Fm $\bar{3}$ m     | 10.90           | 1295.029               |

| <b>Atom</b> | <b>Wyckoff position</b> | <b>x</b> | <b>y</b> | <b>z</b> | <b>Occ.</b> |
|-------------|-------------------------|----------|----------|----------|-------------|
| Cs          | 8c                      | 0.25     | 0.25     | 0.25     | 1           |
| Zr          | 4a                      | 0        | 0        | 0        | 1           |
| Br          | 24e                     | 0.23564  | 0        | 0        | 1           |
